# Supplementary material for: Biofilm Formation Ability and Presence of Adhesion Genes among Coagulase-Negative and Coagulase-Positive Staphylococci Isolates from Raw Cow’s Milk
Source: PubMed Central journal article supplement (PMC7460418; doi:10.3390/pathogens9080654), 2020-08-14
Supplement: pathogens-09-00654-s001.pdf [file pathogens-09-00654-s001.pdf]

## Supplementary Materials

**Table 1.** List of primer sequences used in PCR reactions.

| Gene                                               | Primer Sequence                                                                     | Annealing Temp. (°C) | Amplicon Size (bp) | References |
|----------------------------------------------------|-------------------------------------------------------------------------------------|----------------------|--------------------|------------|
| <i>icaA</i> (intercellular adhesion gene)          | F: TCTCTGTCAGGAGCAATCAA<br>R: TCAGGCACTAACATCCAGCA                                  | 55,5                 | 188                | [1]        |
| <i>icaD</i> (intercellular adhesion gene)          | F: ATGGTCAAGCCCAGACAGAG<br>R: CGTGTTC AACATTTAATGCAA<br>R: GCTCTTGTAAGACCATTTCCTCAC | 55,5                 | 199                | [1]        |
| <i>bap</i> (biofilm associated protein)            | F: CCCTATATCGAAGGTGTAGAATTG<br>R: GCTGTTGAAGTTAATACTGTACCTGC                        | 60                   | 971                | [2]        |
| <i>eno</i> (laminin binding protein)               | F: ACGTGCAGCAGCTGACT<br>R: CAACAGCATCTTCAGTACCTTC                                   | 55                   | 302                | [3]        |
| <i>aap</i> (accumulation associated protein)       | F: AAACGGTGGTATCTTACGTGAA<br>R: CAATGTTGCACCATCTAAATCAGCT                           | 60                   | 466                | [4]        |
| <i>bhp</i> (bap homologue protein)                 | F: CTACAAGTTCAGGTCAAGGACAAGG<br>R: GCGTCGGCGTATATCCTTCAG                            | 60                   | 1583               | [4]        |
| <i>fbe</i> (fibrinogen binding protein)            | F: CTACAAGTTCAGGTCAAGGACAAGG<br>R: GCGTCGGCGTATATCCTTCAG                            | 60                   | 495                | [5]        |
| <i>embP</i> (extracellular matrix binding protein) | F: AGCGGTACAAATGTCAAT<br>R: AGAAGTGCTCTAGCATCATCC                                   | 57                   | 455                | [5]        |
| <i>atlE</i> (autolysin E)                          | F: CAACTGCTCAACCGAGAACA<br>R: TTTGTAGATGTTGTGCCCCA                                  | 55                   | 682                | [5]        |

## References

1. Arciola, C.R.; Baldassarri, L.; Montanaro, L. Presence of *icaA* and *icaD* genes and slime production in a collection of Staphylococcal strains from catheter-associated infections. *J. Clin. Microbiol.* **2001**, *39*, 2151–2156.
2. Cucarella C., Solano C., Valle J., Amorena B., Lasa I., P.J.R. Bap, a Staphylococcus aureus Surface Protein Involved in Biofilm Formation Staphylococcus aureus Surface Protein Involved in Biofilm Formation. *Microbiology* **2001**, *183*, 2888–2896.
3. Tristan, A.; Ying, L.; Bes, M.; Etienne, J.; Vandenesch, F.; Lina, G. Use of multiplex PCR to identify Staphylococcus aureus adhesins involved in human hematogenous infections. *J. Clin. Microbiol.* **2003**, *41*, 4465–4467.
4. Rohde, H.; Burdelski, C.; Bartscht, K.; Hussain, M.; Buck, F.; Horstkotte, M.A.; Knobloch, J.K.M.; Heilmann, C.; Herrmann, M.; Mack, D. Induction of Staphylococcus epidermidis biofilm formation via proteolytic processing of the accumulation-associated protein by staphylococcal and host proteases. *Mol. Microbiol.* **2005**, *55*, 1883–1895.
5. Rohde, H.; Burandt, E.C.; Siemssen, N.; Frommelt, L.; Burdelski, C.; Wurster, S.; Scherpe, S.; Davies, A.P.; Harris, L.G.; Horstkotte, M.A.; et al. Polysaccharide intercellular adhesin or protein factors in biofilm accumulation of Staphylococcus epidermidis and Staphylococcus aureus isolated from prosthetic hip and knee joint infections. *Biomaterials* **2007**, *28*, 1711–1720.

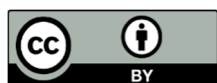

© 2020 by the authors. Submitted for possible open access publication under the terms and conditions of the Creative Commons Attribution (CC BY) license (<http://creativecommons.org/licenses/by/4.0/>).
